# Supplementary material for: How often are interventions in cluster-randomised controlled trials of complex interventions in general practices effective and reasons for potential shortcomings? Protocol and results of a feasibility project for a systematic review
Source: HighWire-hosted journal article supplement (doi:10.1136/bmjopen-2015-009414), 2016-02-01
Supplement: bmjopen-2015-009414supp2.pdf [file bmjopen-2015-009414supp2.pdf]

## SUPPLEMENTARY FILE 2

### Additional information on the ICCs

After requesting additional information on the actually obtained ICCs in order to compare them to those assumed in the sample size calculation, we had both values for 7, or one third of the studies. Two of those were studies that showed no significant treatment effect, while two showed a “partial effect” and three showed a significant treatment effect on all of their respective primary outcomes (which explains the 100% availability of ICC pairs for this particular subgroup). Altogether, 9 assumed and actual ICC pairs for various patient-relevant primary endpoints were available for these 7 publications. In half of the pairs, the assumed ICCs were smaller than actually obtained ICCs (see Table 1)

**Table 1: Number of expected and achieved intra-cluster correlation coefficients**

| <b>Author</b>                      | <b>Primary patient-relevant outcome</b>                                    | <b>ICC - expected</b> | <b>ICC - achieved</b> |
|------------------------------------|----------------------------------------------------------------------------|-----------------------|-----------------------|
| <b>Kennedy 2013<sup>1</sup></b>    | Generic health-related quality of life                                     | 0.05                  | 0.031                 |
| <b>Steventon 2012</b>              | Proportion of people admitted to hospital within the 12 month trial period | 0.001                 | 0.017                 |
| <b>Gensichen 2009<sup>1</sup></b>  | Depression symptoms                                                        | 0.1                   | 0.061                 |
| <b>Griffiths 2013</b>              | Percentage of participants attending for unscheduled asthma care           | 0.05                  | -0.0056               |
| <b>Murphy 2009</b>                 | Changes in physical health status                                          | 0.001                 | 0.076                 |
| <b>Murphy 2009</b>                 | Changes in mental health status                                            | 0.001                 | 0.054                 |
| <b>Murphy 2009</b>                 | Admissions to hospital                                                     | 0.006                 | 0.017                 |
| <b>Metzelthin 2013<sup>1</sup></b> | Disability                                                                 | 0.05                  | 0.4                   |
| <b>Elley 2003<sup>1</sup></b>      | Vitality                                                                   | 0.05                  | 0.01                  |

<sup>1</sup> data obtained from authors
